# Supplementary material for: Hypertriglyceridemic Waist and Metabolic Abnormalities in Brazilian Schoolchildren
Source: PLoS One. 2014 Nov 14;9(11):e111724. doi: 10.1371/journal.pone.0111724 (PMC4232366; doi:10.1371/journal.pone.0111724)
Supplement: Data S1 — Additional data. (XLS) [file pone.0111724.s001.xls]

## Sheet: Plan1
S1. Additional data
SUBJECT	GENDER	AGE (YEARS)	WEIGHT (Kg)	HEIGHT (m)	Waist_Circunference (cm)	Body Mass Index	GLUCOSE	TOTAL CHOLESTEROL	HDL_CHOLESTEROL	N-HDL_CHOLESTEROL	LDL_CHOLESTEROL	TRIGLYDERIDES
1	1	14	80.3	1.63	99	30.22	60	105.7	58.3	47.4	71.6	54.6
2	2	12	38.6	1.53	68	16.49	69	99.3	47.5	51.8	6.8	50.5
3	1	12	64.6	1.67	81	23.16	70	98.2	42.7	55.5	14.2	43.9
4	1	11	49.5	1.54	73	20.87	61	103.1	40.4	62.7	13.9	48.4
5	2	12	38.9	1.54	66	16.4	52	119.3	39.3	80	61.7	64
6	1	11	45	1.55	68	18.73	63	131.7	50.9	80.8	10.1	34.3
7	1	12	43.3	1.59	60	17.13	67	123.9	43	80.9	20.1	71.2
8	2	10	49.8	1.44	84	24.02	79	131.1	49.6	81.5	68.9	54.7
9	2	14	49.3	1.52	73	21.34	72	121.1	36.8	84.3	66.9	66.9
10	2	12	40.5	1.56	62	16.64	74	144.7	58	86.7	94.7	54.4
11	2	13	64.5	1.78	77	20.36	47	122.1	32.2	89.9	15.2	55.6
12	1	13	48.7	1.59	66	19.26	51	134.1	42.3	91.8	14.6	62.7
13	1	11	55.2	1.59	83	21.83	63	150.7	56.5	94.2	67.6	60.5
14	1	14	52.2	1.69	64	18.28	94	133.2	38.3	94.9	62	36.1
15	1	13	63	1.75	83	20.57	71	145.1	49	96.1	12.4	43.2
16	2	12	55.7	1.67	70	19.97	53	138.3	42	96.3	64.3	75.1
17	1	14	48.7	1.59	76	19.26	77	151	54	97	74.7	49.7
18	2	13	55.3	1.79	70	17.26	90	130.8	31.5	99.3	12.3	69.9
19	1	12	44.7	1.63	66	16.82	65	148.7	47.4	101.3	17.3	197.5
20	1	12	60.4	1.51	86	26.49	62	148	46.7	101.3	59.7	73.8
21	1	13	54	1.63	64	20.32	89	143.3	41.6	101.7	12.5	52.3
22	2	14	61.6	1.71	74	21.07	72	152.4	49.4	103	79	39.7
23	2	14	78.3	1.73	89	26.16	66	141.9	38.9	103	94.3	44.6
24	1	12	61.8	1.59	84	24.45	59	141	38	103	57.9	56.8
25	2	11	33.8	1.5	59	15.02	55	156.6	52.4	104.2	14.4	45.7
26	2	13	44.1	1.6	62	17.23	98	145.3	40.8	104.5	45	42.6
27	2	12	61.4	1.6	85	23.98	103	141.2	36	105.2	11.3	52.8
28	1	13	44.5	1.59	65	17.6	77	153.9	47.7	106.2	62.2	68.2
29	1	12	49.5	1.67	62	19.58	100	146.8	40.5	106.3	71.9	68.7
30	1	11	44.8	1.5	72	19.91	68	156.2	49.3	106.9	14.7	61.9
31	2	11	49.4	1.65	68	18.15	109	149.8	42.9	106.9	14.4	73.3
32	1	12	36.1	1.38	66	18.96	51	157.3	50	107.3	73.3	100.7
33	2	13	48.8	1.66	65	17.71	100	153.2	44.5	108.7	60.3	65
34	2	13	56.3	1.63	74	21.19	81	151	40.6	110.4	141.1	79.1
35	2	13	56.4	1.66	70	20.47	66	150.2	39.2	111	69.1	75.3
36	2	11	58.7	1.52	89	25.41	107	156.3	44.5	111.8	46.7	83.3
37	1	13	54	1.58	75	21.63	51	161.3	49.5	111.8	10.6	107.1
38	1	12	76.3	1.7	88	26.4	97	162.1	49.3	112.8	17.3	72.4
39	2	12	42.2	1.59	63	16.69	89	174.5	61.5	113	16	63.6
40	1	10	42.7	1.49	64	19.23	65	169.1	53.3	115.8	71.3	76.4
41	2	12	38.2	1.47	61	17.68	94	168.9	53.1	115.8	84	115.1
42	1	14	68.5	1.65	84	25.16	62	164	48.1	115.9	117.8	42.9
43	2	13	59.4	1.66	83	21.56	71	163	47	116	60.2	80.9
44	2	12	52.6	1.64	72	19.56	88	167.7	50.8	116.9	12.8	78.6
45	2	11	28.3	1.34	57	15.76	65	169.4	52.3	117.1	23.2	77.6
46	2	11	34.3	1.51	60	15.04	61	157.1	38.2	118.9	23.5	89
47	1	13	60.8	1.58	82	24.36	68	158	39	119	12.1	63.4
48	1	12	65.1	1.59	95	25.75	55	178	58.9	119.1	17.7	103.8
49	2	13	48.4	1.52	78	20.95	53	159.9	40.6	119.3	101.4	161
50	2	14	56.6	1.74	71	18.69	85	159.5	39.9	119.6	59.7	86.7
51	1	11	44	1.55	67	18.31	97	162.7	42.7	120	44.6	89.4
52	1	12	44.6	1.49	68	20.09	95	177.1	56.7	120.4	54.5	153.2
53	2	12	37.8	1.49	61	17.03	45	175.1	54.2	120.9	70.5	105.5
54	1	12	35.4	1.6	56	13.83	66	172.9	52	120.9	67.9	116.3
55	1	14	43.4	1.7	64	15.02	60	173.3	52.1	121.2	54.2	64
56	2	11	33.5	1.44	62	16.16	68	174.9	53.1	121.8	11.3	57.3
57	1	13	54.3	1.65	76	19.94	60	177.5	55.6	121.9	80.7	54.8
58	2	11	45.7	1.54	70	19.27	63	173	49	124	112.5	64.1
59	2	11	43.2	1.6	68	16.88	75	176.6	52.1	124.5	75.7	59.1
60	1	14	53.9	1.61	74	20.79	98	172.6	47.8	124.8	7.2	51.7
61	2	13	58.8	1.67	76	21.08	63	167.2	42	125.2	121	70.7
62	2	13	42.4	1.61	61	16.36	84	181.5	55.5	126	96	42.3
63	1	13	57.2	1.67	77	20.51	48	182.2	54.1	128.1	15.1	80.5
64	2	12	39.3	1.53	64	16.79	67	180	51.8	128.2	43.6	70.9
65	2	14	65.4	1.88	78	18.5	76	179.1	49.4	129.7	81.6	47.9
66	2	13	43.1	1.55	66	17.94	78	188.3	58.3	130	64	74.4
67	1	11	35.9	1.43	66	17.56	60	187.4	56.4	131	21.6	73.1
68	1	13	39.4	1.57	67	15.98	57	187.6	55.9	131.7	83.9	68.1
69	2	14	74.8	1.68	83	26.5	79	186.1	54.1	132	26.8	62.7
70	2	14	43.4	1.62	62	16.54	104	181.9	49.8	132.1	36.4	59.6
71	1	11	50.3	1.5	77	22.36	65	185.6	53.3	132.3	75.9	59.4
72	1	12	57.9	1.63	78	21.79	65	185.6	53.3	132.3	81.5	73
73	1	11	51.7	1.65	73	18.99	67	192.1	59.6	132.5	10.8	62.6
74	1	14	61.5	1.69	77	21.53	62	182.3	48.7	133.6	143.1	89.5
75	1	12	57.3	1.7	75	19.83	60	181.3	47.6	133.7	179	60.6
76	2	12	34	1.48	60	15.52	86	182.6	48.6	134	14.8	265.7
77	2	13	32.4	1.47	62	14.99	90	179	43.5	135.5	15.7	75.9
78	2	12	46.5	1.5	79	20.67	76	184.5	48.7	135.8	103.5	120.6
79	2	13	54.3	1.69	69	19.01	78	189.4	53.3	136.1	16.5	70.9
80	2	12	77.8	1.72	98	26.3	63	181.7	45.1	136.6	62	66.6
81	1	13	48.3	1.65	67	17.74	100	186.4	49	137.4	74.9	58.9
82	2	11	37.2	1.58	64	14.9	52	195.8	58.1	137.7	71.8	51.8
83	1	14	52.5	1.58	68	21.03	88	192.2	54.4	137.8	8.7	32.3
84	2	11	44.7	1.5	77	19.87	67	193.1	55.2	137.9	59.2	70.5
85	2	13	74.2	1.65	96	27.25	102	191.8	53.2	138.6	73.4	72
86	1	11	42.5	1.53	71	18.16	68	190.2	51.4	138.8	61	60.2
87	2	12	40.8	1.46	81	19.14	71	190.1	51.2	138.9	14.1	90.2
88	1	14	55.2	1.6	80	21.56	67	192.4	52.4	140	79.3	57.2
89	1	13	51.6	1.69	63	18.07	85	180.3	40.2	140.1	18.9	94.5
90	1	13	53.7	1.58	68	21.51	91	189.7	49.3	140.4	15	52
91	1	12	38.3	1.48	59	17.49	58	183.3	42.9	140.4	56.2	42
92	2	11	50.5	1.6	72	19.73	72	183.1	42.1	141	51.5	57.9
93	1	12	54.6	1.77	70	17.43	51	194	52.7	141.3	89.7	42.7
94	2	13	54.7	1.49	80	24.64	88	199.4	57.2	142.2	151.9	65.9
95	1	12	26.6	1.35	53	14.6	95	186.6	44.4	142.2	88.3	119.5
96	1	11	51.6	1.5	70	22.93	100	176.5	34	142.5	48.6	118.9
97	2	13	55.4	1.71	69	18.95	98	188.4	45.1	143.3	49.3	76
98	1	11	34.1	1.44	60	16.44	84	199.5	56.1	143.4	8.5	56.9
99	1	14	49.7	1.66	66	18.04	61	194.7	50.5	144.2	78.1	91.8
100	1	14	54.9	1.66	70	19.92	102	195	50.7	144.3	10.4	54.3
101	2	14	88	1.81	95	26.86	71	185.9	41	144.9	115.1	71.2
102	1	11	37.3	1.39	61	19.31	72	195.1	49.9	145.2	49.3	58.7
103	1	13	33.4	1.48	63	15.25	76	187.4	41.4	146	113.5	72.4
104	2	11	40.7	1.44	72	19.63	85	202.8	56.6	146.2	13.7	131.7
105	1	12	25.9	1.45	51	12.32	95	192.1	45.8	146.3	16.6	70
106	1	14	44	1.56	62	18.08	95	192.1	45.8	146.3	44.3	70
107	1	13	66.1	1.6	94	25.82	66	189.5	43.2	146.3	15.2	108
108	1	11	50.5	1.62	72	19.24	57	205.1	58.4	146.7	15.9	79.9
109	2	13	49.2	1.57	69	19.96	93	195.3	48.4	146.9	6.4	56.1
110	2	11	44.8	1.48	73	20.45	84	205.4	58	147.4	79.3	108.6
111	1	14	57.4	1.63	54	21.6	79	202.8	54.9	147.9	80.4	58
112	1	13	40.9	1.58	62	16.38	59	201.8	53.6	148.2	67.3	90.7
113	2	13	49.1	1.59	72	19.42	96	189.8	40.1	149.7	63.4	56.7
114	1	14	47.7	1.57	64	19.35	72	197.7	47.8	149.9	90.6	62.7
115	1	11	31	1.4	59	15.82	89	200.9	50.3	150.6	56.7	79.9
116	2	14	58.9	1.62	80	22.44	82	202.3	50.7	151.6	68.8	93.6
117	1	11	47.7	1.41	73	23.99	62	212.8	61.1	151.7	14	94.7
118	1	13	39.4	1.55	65	16.4	59	210.2	58.3	151.9	65.2	74.5
119	1	14	46.4	1.6	63	18.13	94	210.7	58.7	152	140.4	75.3
120	2	11	35.9	1.43	63	17.56	90	204.1	52	152.1	10.8	54.5
121	1	11	35.8	1.44	63	17.26	82	211.4	59.3	152.1	8	105.6
122	1	12	33.2	1.49	58	14.95	63	188.8	36.7	152.1	10.4	153.1
123	1	11	37	1.5	64	16.44	73	198.1	44.5	153.6	78.9	64
124	2	12	39.2	1.5	71	17.42	60	202.8	49.1	153.7	18	115.9
125	2	14	60.6	1.65	74	22.26	103	197	42.7	154.3	126.9	62
126	2	12	43.2	1.58	69	17.3	101	196	41	155	59.9	80.1
127	1	14	61.2	1.61	87	23.61	93	193.7	38.2	155.5	15.1	88.8
128	1	13	42.6	1.46	66	19.98	60	214.7	59.1	155.6	15.8	62.1
129	2	12	34.1	1.45	71	16.22	87	214.1	58.5	155.6	84.6	163.3
130	1	13	42.1	1.56	65	17.3	99	206.5	50.6	155.9	85.9	184.6
131	1	12	40.6	1.55	64	16.9	72	212	56	156	85.2	49.7
132	2	12	48.7	1.52	79	21.08	62	196.8	40.6	156.2	120.1	108.1
133	2	13	58.2	1.75	81	19	66	195.6	38.7	156.9	67.1	58.9
134	1	14	49.1	1.62	67	18.71	95	203.1	45.8	157.3	12.8	36.1
135	2	12	57	1.62	74	21.07	116	191.7	32.8	158.9	24.3	86.4
136	1	13	37.1	1.51	58	16.27	65	215.2	56.2	159	19.2	54.6
137	1	13	44.3	1.65	64	16.27	63	204.6	45.2	159.4	7.1	75.8
138	1	13	50.6	1.62	73	19.28	53	201.3	41.3	160	69.4	60.4
139	1	14	60.6	1.62	71	23.09	83	209.5	49.5	160	67.3	127.5
140	1	14	48.7	1.62	69	18.56	64	214	53.7	160.3	81.5	75.7
141	2	14	54.2	1.64	72	20.15	88	201.9	40.8	161.1	68.7	65.9
142	2	14	60.9	1.78	73	19.22	75	203.1	41.2	161.9	65.4	71
143	1	14	52	1.57	76	21.1	70	211.6	49.3	162.3	87.1	81.5
144	2	11	39.7	1.53	69	16.96	57	214.5	52.2	162.3	13	66.7
145	2	11	43.2	1.49	68	19.46	95	219.2	56.6	162.6	69.7	88.8
146	1	11	45.5	1.49	71	20.49	91	213.1	49.6	163.5	16.8	135.9
147	1	13	49.7	1.51	72	21.8	77	210.6	46.7	163.9	10.5	53.1
148	2	13	52.8	1.68	68	18.71	112	215.6	51.2	164.4	96.5	145
149	1	11	66.4	1.63	88	24.99	88	219.9	54	165.9	47.1	75
150	2	14	53.8	1.77	69	17.17	105	218.7	51.8	166.9	15.5	76.3
151	2	12	43.7	1.48	67	19.95	100	220.4	53.5	166.9	90.5	89.5
152	2	14	64	1.72	83	21.63	101	208.7	40	168.7	72.2	75.5
153	1	11	45.8	1.6	67	17.89	76	228.7	59.9	168.8	10.9	49.2
154	1	13	57.4	1.6	70	22.42	100	215.5	46.6	168.9	13.3	109.5
155	1	11	58.9	1.52	87	25.49	101	223.3	54	169.3	56.2	114
156	2	11	41.3	1.53	66	17.64	96	224.5	54.7	169.8	75.2	108.3
157	1	14	33.1	1.56	57	13.6	90	223	53	170	53	121.6
158	2	11	54.9	1.64	73	20.41	72	222.1	52	170.1	52.8	74.8
159	2	10	58.5	1.48	92	26.71	68	221.5	49.9	171.6	7.2	97.8
160	1	10	35.6	1.47	66	16.47	59	222.2	50.5	171.7	135.6	45.2
161	2	13	55.7	1.61	81	21.49	70	226.2	53.2	173	53.8	82.2
162	1	13	58	1.64	88	21.56	61	227.9	54.8	173.1	192	110.1
163	2	14	93.9	1.78	102	29.64	75	219.8	46.4	173.4	92.6	73.2
164	1	11	43.2	1.53	66	18.45	98	224.9	51.1	173.8	12.5	94.1
165	2	12	33.7	1.51	60	16.1	90	218.1	44	174.1	149.1	83
166	2	12	47.2	1.66	70	17.13	78	227.2	53	174.2	22.5	91.8
167	1	13	49.9	1.55	78	20.77	52	226.5	51.1	175.4	66.6	83.9
168	1	13	44.8	1.65	66	16.46	69	236.7	60.5	176.2	80.6	63.2
169	1	13	50.5	1.65	74	18.55	72	229.2	51.7	177.5	68.5	66.4
170	1	12	36.4	1.62	62	13.87	102	228.7	51	177.7	34.2	49.7
171	1	11	51	1.55	76	21.23	71	235.2	56.8	178.4	17.7	63.2
172	2	13	45.7	1.55	71	19.02	84	237.1	58.7	178.4	78.9	130.1
173	2	14	63.9	1.68	76	22.64	74	227.4	48.5	178.9	67.7	66.9
174	2	11	67.2	1.6	94	26.25	81	228.6	48.7	179.9	75.7	141.6
175	2	11	54.7	1.58	79	21.91	109	230.8	49.7	181.1	148	125.6
176	2	13	73.1	1.66	91	26.53	78	229.2	46.5	182.7	108	134.3
177	2	12	53.7	1.66	77	19.49	66	245.1	61.8	183.3	64	49.8
178	1	10	28.1	1.42	59	13.94	53	237.9	54.6	183.3	71.8	115.3
179	1	12	39.4	1.49	65	18.29	101	240	56.4	183.6	52.5	95.7
180	2	12	53	1.49	85	23.87	73	236	51.6	184.4	87.2	87
181	1	13	49.4	1.62	71	18.82	103	243.7	58.5	185.2	16.7	92.5
182	2	12	61	1.52	80	14.02	95	241.5	55.4	186.1	49.8	61
183	2	10	59.6	1.53	84	25.46	99	229.5	43.1	186.4	9.9	62.1
184	1	11	25.7	1.39	52	13.3	80	242.8	56	186.8	14.4	122.8
185	1	14	62	1.61	80	23.92	63	232.2	45.2	187	9.6	35.7
186	1	13	39.6	1.58	61	15.86	121	234.3	46.9	187.4	86.9	95.2
187	1	10	29.5	1.42	59	14.63	63	247.9	59.6	188.3	77.2	49.2
188	1	13	63.3	1.55	83	26.35	71	243	54.5	188.5	76.7	86.4
189	1	11	53.9	1.55	82	22.43	94	237.1	48.6	188.5	52.9	40.2
190	2	14	77	1.81	85	23.5	109	228.3	39.4	188.9	109.9	49.3
191	2	14	44.1	1.65	62	16.2	95	234.2	44.6	189.6	64.8	64.1
192	2	14	60	1.74	71	19.82	95	234.2	44.6	189.6	51.2	64.1
193	1	12	65.1	1.58	85	26.08	74	246.2	56.4	189.8	48.6	62.9
194	1	12	55.8	1.58	71	22.35	92	247.7	57.5	190.2	75	94.7
195	1	14	41.5	1.63	64	15.62	59	244.2	53.3	190.9	153.6	115.6
196	1	12	35.5	1.42	68	17.61	72	246.8	54.2	192.6	75.7	80.9
197	2	11	42.7	1.43	61	20.88	90	238.6	45.3	193.3	141	201.7
198	2	12	30.5	1.32	60	17.5	66	248.2	52.9	195.3	80.8	52.1
199	1	12	48	1.54	68	20.24	76	254.6	57.2	197.4	44.8	83.7
200	1	14	55	1.62	71	20.96	61	248.9	50.1	198.8	64.1	74.3
201	1	12	58.8	1.54	79	24.79	42	257.2	57.9	199.3	81	65.6
202	1	12	55.4	1.64	78	20.6	87	248.4	48.9	199.5	67.2	224.6
203	2	14	63	1.74	77	20.81	106	246.7	46.9	199.8	76.5	72.6
204	1	12	49.6	1.48	76	22.64	103	253.2	53.1	200.1	64.8	112.8
205	2	11	53.3	1.56	82	21.9	89	248.9	47.2	201.7	54.4	68.8
206	1	12	55.6	1.63	64	20.93	92	259.3	55.9	203.4	62.3	266.4
207	2	12	53.7	1.6	80	20.98	72	258.5	54	204.5	12.6	71.7
208	2	14	85.7	1.82	92	25.87	94	250.8	46.1	204.7	99.4	294.1
209	1	10	40.9	1.44	74	19.72	68	256.7	49.7	207	14	56.3
210	1	13	81.3	1.7	95	28.13	89	240.7	33.6	207.1	63.3	195.9
211	2	14	53.7	1.63	75	20.21	83	249.1	39.9	209.2	117.7	82
212	2	12	36.7	1.45	66	17.98	116	262.6	53.1	209.5	15	66.1
213	1	13	42.6	1.58	68	17.06	64	274.9	61.7	213.2	70.4	88.1
214	1	12	47.4	1.59	70	18.75	68	257.7	42.5	215.2	52.6	92.3
215	1	11	35.5	1.45	65	16.88	108	277	59.3	217.7	72.8	110.4
216	1	13	74.2	1.54	103	31.29	85	258.8	40.9	217.9	18.9	138.4
217	1	11	52.8	1.56	71	21.7	85	272.9	53.2	219.7	90.5	151.1
218	1	14	51.6	1.61	67	19.91	95	278.4	58.3	220.1	130.6	182.2
219	2	12	39.4	1.5	71	17.51	90	263.4	42.7	220.7	10.3	77.1
220	1	11	38.4	1.58	66	15.38	82	277	56.2	220.8	81.4	141.7
221	1	12	46.3	1.6	65	18.09	72	274.4	52.7	221.7	80.1	147.2
222	1	12	29.1	1.47	57	13.47	57	263.8	41.9	221.9	15.4	82.7
223	2	12	46	1.6	71	17.97	90	259.7	34.4	225.3	44	163.5
224	1	13	50.3	1.6	67	19.65	93	280.8	54.6	226.2	53.1	86.5
225	1	12	41.4	1.45	70	19.69	85	275.5	49	226.5	14.3	110.8
226	1	12	58.9	1.58	88	23.59	95	275.6	46.1	229.5	37.4	137.2
227	2	12	71.2	1.62	94	27.13	90	285.9	53.5	232.4	53.2	267.3
228	2	11	51.3	1.52	84	22.2	91	282.5	49.9	232.6	27.4	84.3
229	2	10	42.4	1.48	73	19.36	90	287.6	54.9	232.7	71.4	84.2
230	2	11	69.6	1.48	96	31.78	99	280.7	46.4	234.3	43	82.9
231	1	11	44.6	1.51	75	19.56	75	277.6	40.2	237.4	119	208.7
232	1	11	65.5	1.58	86	26.24	95	280.4	40.3	240.1	57.8	123.1
233	1	11	46.7	1.55	69	19.44	103	292.4	51.3	241.1	52.5	79.3
234	1	12	42.7	1.61	79	16.47	73	290.7	49.5	241.2	95.9	233.4
235	2	13	46.3	1.61	66	17.86	106	301.4	59.2	242.2	65.3	72.3
236	1	11	48.8	1.53	59	20.85	107	296.4	49.5	246.9	64.3	96.4
237	1	11	40.5	1.44	70	19.53	104	291.8	42.4	249.4	26	81.8
238	1	11	74.3	1.6	109	29.02	72	305.8	56.2	249.6	114.1	277.6
239	1	13	57.2	1.59	84	22.63	57	308.2	57.7	250.5	120.2	138.4
240	1	14	39.7	1.54	63	16.74	77	324.8	69.9	254.9	94.5	111
241	1	11	44.3	1.6	69	17.3	84	317.4	44.8	272.6	82.8	138.1
